# Supplementary material for: Transparent glass-ceramics functionalized with EuSiO3constrained BaF2:Eu2+nanocrystals: theoretical design and experimental fulfillment towards an efficient spectral converter
Source: Royal Society of Chemistry journal article supplement (doi:10.1039/d2tc03032b), 2022-01-01
Supplement: d2tc03032b1.pdf [file d2tc03032b1.pdf]

## Supporting Information

### **Transparent glass-ceramics functionalized with EuSiO<sub>3</sub> shell constrained BaF<sub>2</sub>: Eu<sup>2+</sup> nanocrystals: Theoretical design and experimental fulfillment towards an efficient spectral converter**

*Chenhao Wang<sup>#</sup>, Di Wang<sup>#</sup>, Xiuxia Xu, Pengcheng Li, Zhao Junjie, Xvsheng Qiao\*, Jincheng Du, Guodong Qian and Xianping Fan*

Chenhao Wang, Pengcheng Li, Xiuxia Xu, Zhao Junjie, Dr. Xvsheng Qiao, Prof. Guodong Qian, Prof. Xianping Fan

State Key Laboratory of Silicon Materials & School of Materials Science and Engineering, Zhejiang University, Hangzhou 310027, China

School of Materials Science and Engineering, Tianjin University, Tianjin, 300350, China

Di Wang,

State Key Laboratory of Silicon Materials, MOE Key Laboratory of Macromolecular Synthesis and Functionalization, Department of Polymer Science and Engineering, Zhejiang University, Hangzhou 310027, China

Prof. Jincheng Du

Department of Materials Science and Engineering, University of North Texas, Denton, Texas 76203-5017, U.S.

<sup>#</sup> Chenhao Wang and Di Wang contribute equally to the study.

\*E-mail: qiaoxus@zju.edu.cn; fanxp@zju.edu.cn

Table S1 Composition of the glass samples with BaO/BaF<sub>2</sub> substitution, as well as glass transition temperature (T<sub>g</sub>), first crystallization temperature (T<sub>c1</sub>) and second crystallization temperature (T<sub>c2</sub>) of the glass samples

| Sample  | Composition (mol%)                                                                                        | T <sub>g</sub> (°C) | T <sub>c1</sub> (°C) | T <sub>c2</sub> (°C) | T <sub>c1</sub> -T <sub>g</sub> (°C) | T <sub>c2</sub> -T <sub>g</sub> (°C) |
|---------|-----------------------------------------------------------------------------------------------------------|---------------------|----------------------|----------------------|--------------------------------------|--------------------------------------|
| G-F18   | 50SiO <sub>2</sub> -21Al <sub>2</sub> O <sub>3</sub><br>-18BaF <sub>2</sub> -7NaF-4EuF <sub>3</sub>       | 547                 | 606                  | 721                  | 59                                   | 174                                  |
| G-O2F16 | 50SiO <sub>2</sub> -21Al <sub>2</sub> O <sub>3</sub> -2BaO<br>-16BaF <sub>2</sub> -7NaF-4EuF <sub>3</sub> | 552                 | 617                  | 714                  | 65                                   | 162                                  |
| G-O4F14 | 50SiO <sub>2</sub> -21Al <sub>2</sub> O <sub>3</sub> -4BaO<br>-14BaF <sub>2</sub> -7NaF-4EuF <sub>3</sub> | 557                 | 623                  | 730                  | 66                                   | 173                                  |
| G-O6F12 | 50SiO <sub>2</sub> -21Al <sub>2</sub> O <sub>3</sub> -12BaF <sub>2</sub><br>-6BaO-7NaF-4EuF <sub>3</sub>  | 558                 | 630                  | 744                  | 72                                   | 186                                  |
| G-O8F10 | 50SiO <sub>2</sub> -21Al <sub>2</sub> O <sub>3</sub> -8BaO<br>-10BaF <sub>2</sub> -7NaF-4EuF <sub>3</sub> | 558                 | 621                  | 716                  | 63                                   | 158                                  |

Table S2 Composition of the glass samples with Al<sub>2</sub>O<sub>3</sub>/BaF<sub>2</sub> substitution, as well as glass transition temperature (T<sub>g</sub>), first crystallization temperature (T<sub>c1</sub>) and second crystallization temperature (T<sub>c2</sub>) of the glass samples.

| Sample     | Composition (mol%)                                                                                   | T <sub>g</sub> (°C) | T <sub>c1</sub> (°C) | T <sub>c2</sub> (°C) | T <sub>c1</sub> -T <sub>g</sub> (°C) | T <sub>c2</sub> -T <sub>g</sub> (°C) |
|------------|------------------------------------------------------------------------------------------------------|---------------------|----------------------|----------------------|--------------------------------------|--------------------------------------|
| G-Al17Ba22 | 50SiO <sub>2</sub> -17Al <sub>2</sub> O <sub>3</sub> -<br>22BaF <sub>2</sub> -7NaF-4EuF <sub>3</sub> | 557                 | 618                  | 724                  | 61                                   | 167                                  |
| G-Al19Ba20 | 50SiO <sub>2</sub> -19Al <sub>2</sub> O <sub>3</sub> -<br>20BaF <sub>2</sub> -7NaF-4EuF <sub>3</sub> | 546                 | 600                  | 721                  | 54                                   | 175                                  |
| G-Al21Ba18 | 50SiO <sub>2</sub> -21Al <sub>2</sub> O <sub>3</sub> -<br>18BaF <sub>2</sub> -7NaF-4EuF <sub>3</sub> | 547                 | 606                  | 721                  | 59                                   | 174                                  |
| G-Al23Ba16 | 50SiO <sub>2</sub> -23Al <sub>2</sub> O <sub>3</sub> -<br>16BaF <sub>2</sub> -7NaF-4EuF <sub>3</sub> | 546                 | 606                  | 717                  | 60                                   | 171                                  |
| G-Al25Ba14 | 50SiO <sub>2</sub> -17Al <sub>2</sub> O <sub>3</sub> -<br>14BaF <sub>2</sub> -7NaF-4EuF <sub>3</sub> | 556                 | 613                  | 750                  | 57                                   | 194                                  |

Table S3 Composition of the glass samples with different Eu doping, as well as glass transition temperature ( $T_g$ ), first crystallization temperature ( $T_{c1}$ ) and second crystallization temperature ( $T_{c2}$ ) of the glass samples.

| Sample  | Composition (mol %)                                                                                     | $T_g$ (°C) | $T_{c1}$ (°C) | $T_{c2}$ (°C) | $T_{c1}-T_g$ (°C) | $T_{c2}-T_g$ (°C) |
|---------|---------------------------------------------------------------------------------------------------------|------------|---------------|---------------|-------------------|-------------------|
| G-Eu0.5 | 50SiO <sub>2</sub> -21Al <sub>2</sub> O <sub>3</sub><br>-21.5BaF <sub>2</sub> -7NaF-0.5EuF <sub>3</sub> | 545        | 591           | 641           | 46                | 96                |
| G-Eu1   | 50SiO <sub>2</sub> -21Al <sub>2</sub> O <sub>3</sub><br>-21BaF <sub>2</sub> -7NaF-1EuF <sub>3</sub>     | 544        | 592           | 638           | 48                | 94                |
| G-Eu2   | 50SiO <sub>2</sub> -21Al <sub>2</sub> O <sub>3</sub><br>-20BaF <sub>2</sub> -7NaF-2EuF <sub>3</sub>     | 537        | 588           | 680           | 51                | 143               |
| G-Eu4   | 50SiO <sub>2</sub> -21Al <sub>2</sub> O <sub>3</sub><br>-18BaF <sub>2</sub> -7NaF-4EuF <sub>3</sub>     | 547        | 606           | 721           | 59                | 174               |
| G-Eu6   | 50SiO <sub>2</sub> -21Al <sub>2</sub> O <sub>3</sub><br>-16BaF <sub>2</sub> -7NaF-6EuF <sub>3</sub>     | 548        | 617           | 731           | 69                | 183               |

Table S4 Composition and thermal treatment method of the glass-ceramics samples with thermal treatment at different temperature for 1 hour.

| Sample | Composition (mol %)                                                                                 | Treatment Temperature (°C) | Treatment Time (h) |
|--------|-----------------------------------------------------------------------------------------------------|----------------------------|--------------------|
| GC-580 | 50SiO <sub>2</sub> -21Al <sub>2</sub> O <sub>3</sub><br>-20BaF <sub>2</sub> -7NaF-2EuF <sub>3</sub> | 580                        | 1                  |
| GC-600 | 50SiO <sub>2</sub> -21Al <sub>2</sub> O <sub>3</sub><br>-20BaF <sub>2</sub> -7NaF-2EuF <sub>3</sub> | 600                        | 1                  |
| GC-620 | 50SiO <sub>2</sub> -21Al <sub>2</sub> O <sub>3</sub><br>-20BaF <sub>2</sub> -7NaF-2EuF <sub>3</sub> | 620                        | 1                  |
| GC-640 | 50SiO <sub>2</sub> -21Al <sub>2</sub> O <sub>3</sub><br>-20BaF <sub>2</sub> -7NaF-2EuF <sub>3</sub> | 640                        | 1                  |

Table S5 Composition and thermal treatment method of the glass-ceramics samples with thermal treatment at 580 °C for different time

| Sample  | Composition (mol %)                                                                                 | Treatment Temperature (°C) | Treatment Time (h) |
|---------|-----------------------------------------------------------------------------------------------------|----------------------------|--------------------|
| GC-1 h  | 50SiO <sub>2</sub> -21Al <sub>2</sub> O <sub>3</sub><br>-20BaF <sub>2</sub> -7NaF-2EuF <sub>3</sub> | 580                        | 1                  |
| GC-2 h  | 50SiO <sub>2</sub> -21Al <sub>2</sub> O <sub>3</sub><br>-20BaF <sub>2</sub> -7NaF-2EuF <sub>3</sub> | 580                        | 2                  |
| GC-4 h  | 50SiO <sub>2</sub> -21Al <sub>2</sub> O <sub>3</sub><br>-20BaF <sub>2</sub> -7NaF-2EuF <sub>3</sub> | 580                        | 4                  |
| GC-8 h  | 50SiO <sub>2</sub> -21Al <sub>2</sub> O <sub>3</sub><br>-20BaF <sub>2</sub> -7NaF-2EuF <sub>3</sub> | 580                        | 8                  |
| GC-16 h | 50SiO <sub>2</sub> -21Al <sub>2</sub> O <sub>3</sub><br>-20BaF <sub>2</sub> -7NaF-2EuF <sub>3</sub> | 580                        | 16                 |

Table S6 The evaluated PL lifetime of Eu<sup>2+</sup> in the glass-ceramic samples obtained through heat treating G-Eu2 at 580~640 °C for 1 hour.

| Sample   | GC-580 | GC-600 | GC-620 | GC-640 |
|----------|--------|--------|--------|--------|
| A1       | 0.357  | 0.365  | 0.342  | 0.381  |
| t1 [ns]  | 121.8  | 109.8  | 150.6  | 149.7  |
| A2       | 0.577  | 0.577  | 0.607  | 0.561  |
| t2 [ns]  | 732.1  | 723.8  | 773.9  | 727.0  |
| <τ> [ns] | 675.2  | 670.1  | 712.3  | 656.1  |

Table S7 The evaluated PL lifetime of  $\text{Eu}^{2+}$  in the glass-ceramic samples obtained through heat treating G-Eu2 at 580 °C for 1 hour ~16 hours.

| Sample                      | GC-1h | GC-2h | GC-4h | GC-8h | GC-16h |
|-----------------------------|-------|-------|-------|-------|--------|
| A1                          | 0.357 | 0.372 | 0.320 | 0.356 | 0.360  |
| t1 [ns]                     | 121.8 | 150.4 | 113.3 | 162.2 | 180.4  |
| A2                          | 0.577 | 0.585 | 0.604 | 0.585 | 0.587  |
| t2 [ns]                     | 732.1 | 745.2 | 706.1 | 768.0 | 769.8  |
| $\langle \tau \rangle$ [ns] | 675.2 | 677.5 | 659.7 | 698.9 | 695.7  |

Table S8 The amounts of different atoms in one simulation cell (atoms in G-Al21Ba18 and G-Eu4 are the same as G-F18).

| Sample     | Si   | Al   | Na  | La  | F    | O    | Ba  |
|------------|------|------|-----|-----|------|------|-----|
| G-F18      | 1000 | 840  | 140 | 80  | 1100 | 3260 | 360 |
| G-O2F16    | 1000 | 840  | 140 | 80  | 1020 | 3300 | 360 |
| G-O4F14    | 1000 | 840  | 140 | 80  | 940  | 3340 | 360 |
| G-O6F12    | 1000 | 840  | 140 | 80  | 860  | 3380 | 360 |
| G-O8F10    | 1000 | 840  | 140 | 80  | 780  | 3420 | 360 |
| G-Al17Ba22 | 1000 | 680  | 140 | 80  | 1260 | 3020 | 440 |
| G-Al19Ba20 | 1000 | 760  | 140 | 80  | 1180 | 3140 | 400 |
| G-Al23Ba16 | 1000 | 920  | 140 | 80  | 1020 | 3380 | 320 |
| G-Al25Ba14 | 1000 | 1000 | 140 | 80  | 940  | 3500 | 280 |
| G-Eu0.5    | 1000 | 840  | 140 | 10  | 1030 | 3260 | 430 |
| G-Eu1      | 1000 | 840  | 140 | 20  | 1040 | 3260 | 420 |
| G-Eu2      | 1000 | 840  | 140 | 40  | 1060 | 3260 | 400 |
| G-Eu6      | 1000 | 840  | 140 | 120 | 1140 | 3260 | 320 |

Table S9 The performance of the another OSCs with spectral converting glass-ceramics as filters.

| Filter glass  | $V_{oc}$ (V) | $J_{sc}$ (mA cm <sup>-2</sup> ) | FF     | PCE (%) | $J_{calc.}$ (mA cm <sup>-2</sup> ) |
|---------------|--------------|---------------------------------|--------|---------|------------------------------------|
| Quartz glass  | 0.840        | 23.54                           | 0.7183 | 14.18   | 23.48                              |
| Sample GC-Eu2 | 0.839        | 24.22                           | 0.7191 | 14.62   | 24.15                              |

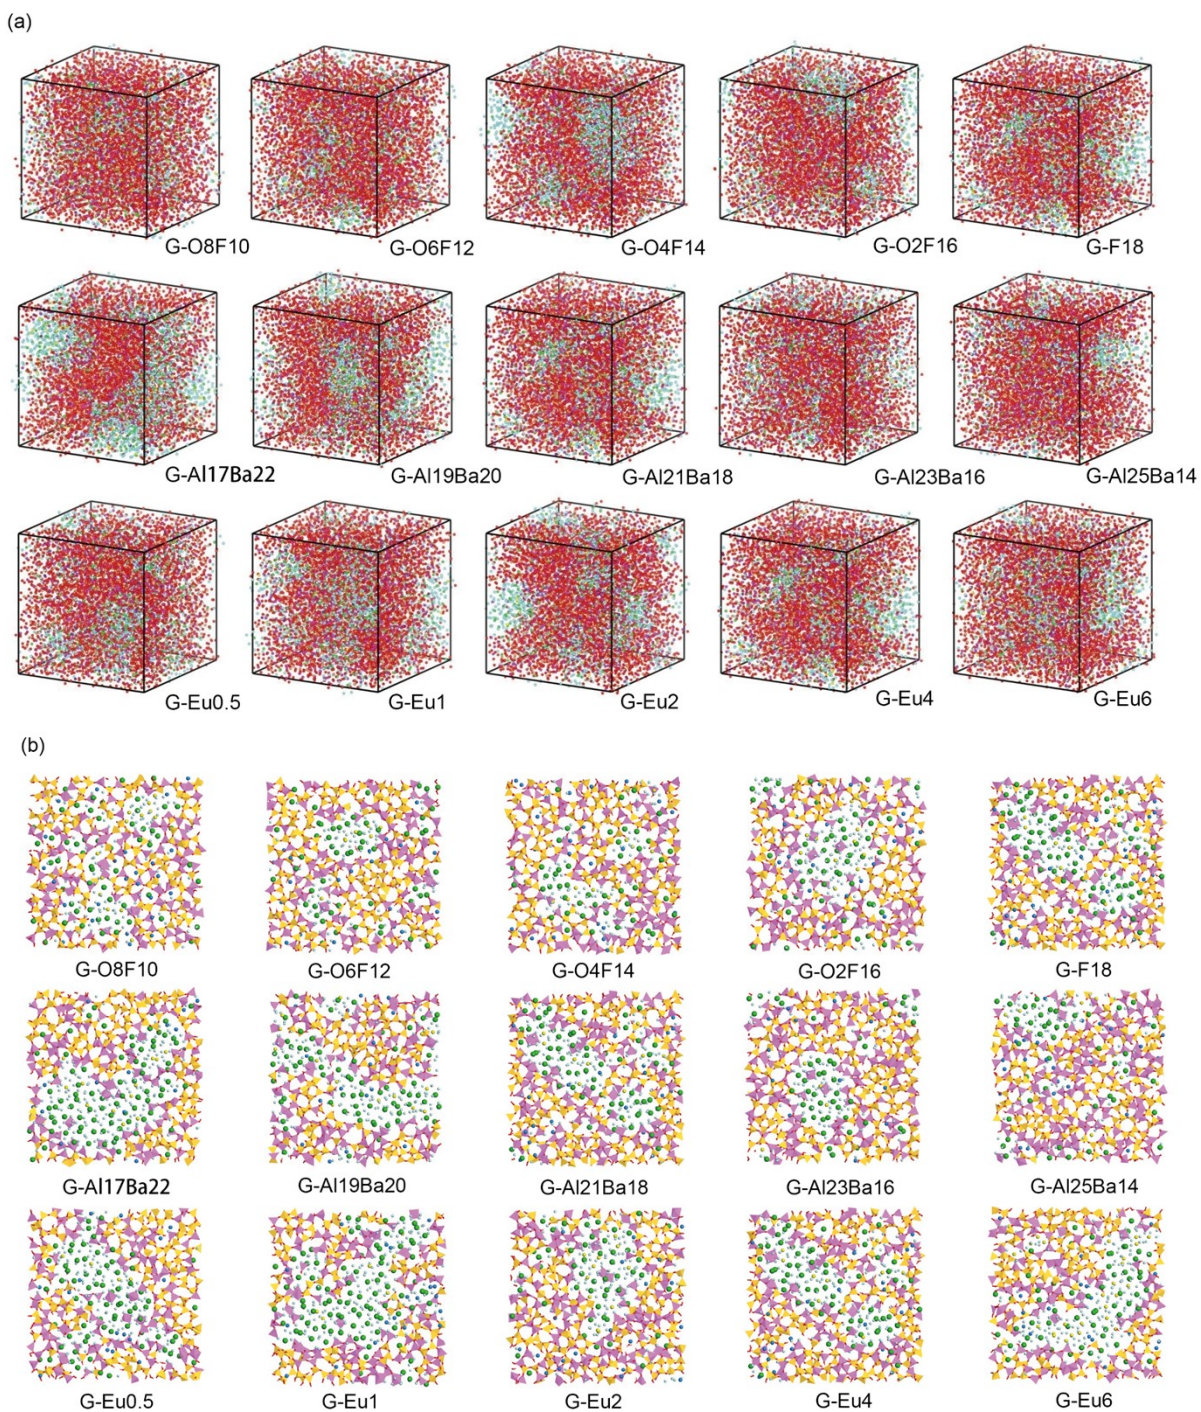

Figure S1 Molecular dynamic (MD) simulated structures for all the investigated glass samples list in Table 1~3 (a). Snapshots from MD simulations for all the investigated glass samples list in Table 1~3 (b).

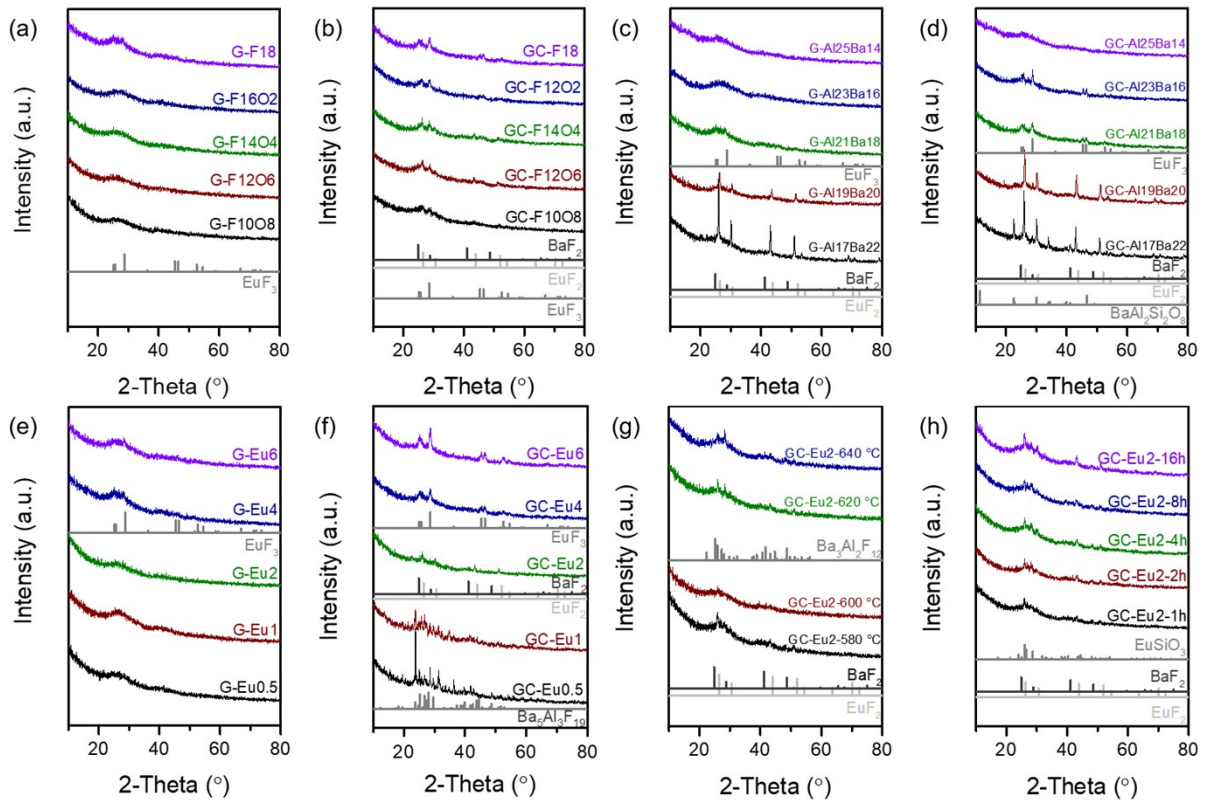

Figure S2 XRD curves of all the investigated samples list in Table 1~5.



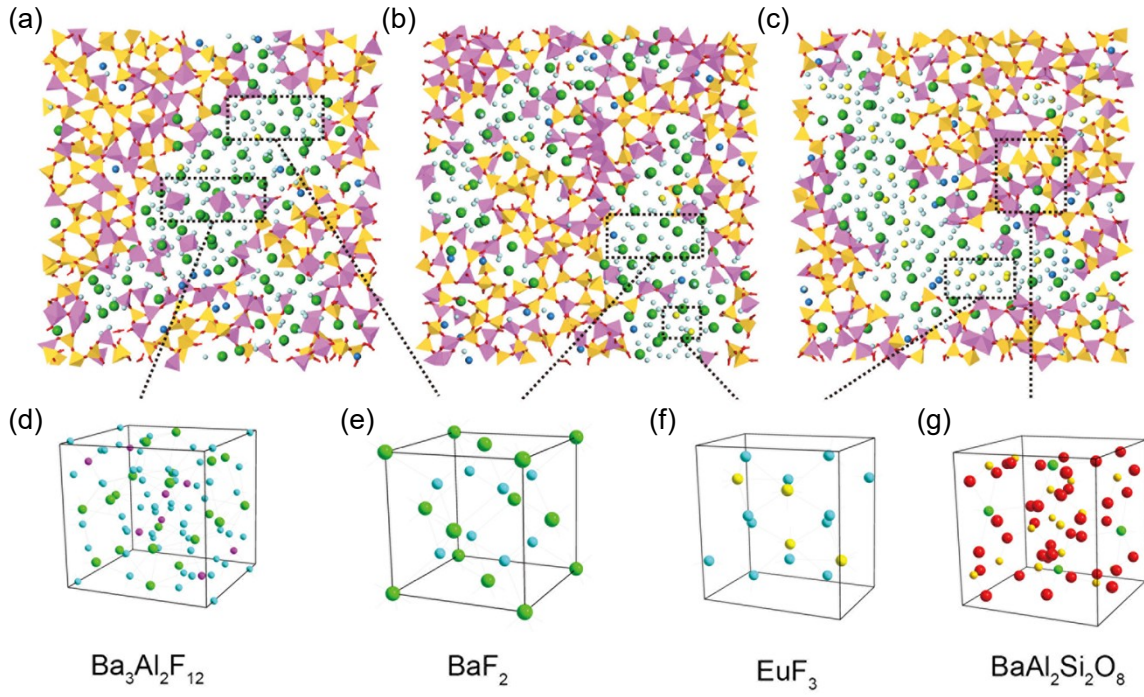

Figure S3 Snapshots from MD simulations to show the phase separation in the glasses Eu<sub>0.5</sub> (a), Eu<sub>2</sub>(b) and Eu<sub>6</sub> (c). Orange: Si, pink: Al, yellow: La, blue: Na, cyan: F, red: O. It can predict the precipitation of Ba<sub>3</sub>Al<sub>2</sub>F<sub>12</sub> (d) /BaF<sub>2</sub> (e) /EuF<sub>3</sub> (f) /Ba<sub>3</sub>Al<sub>2</sub>F<sub>12</sub> (g) crystallites from the separated fluoride phases as well as the precipitation of BaAl<sub>2</sub>Si<sub>2</sub>O<sub>8</sub> feldspar phases from the separated oxide phases.



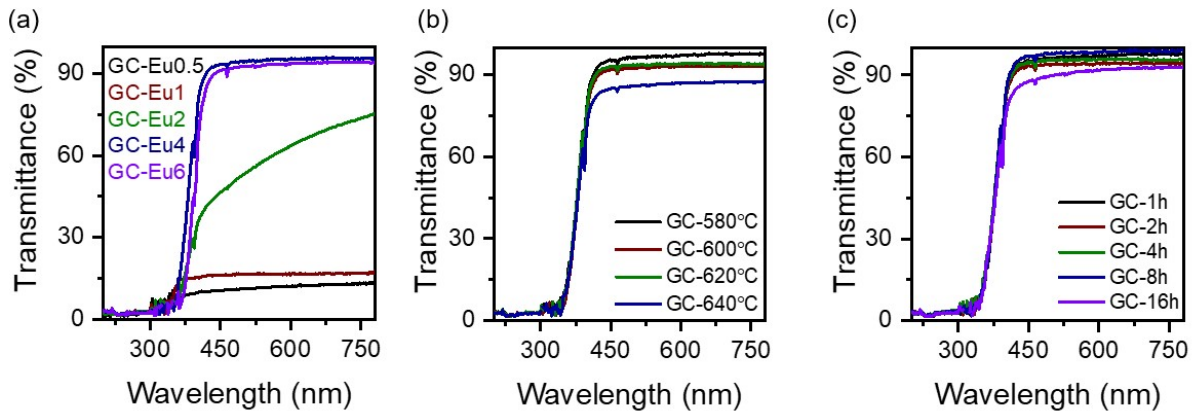

Figure S4 Optical absorption spectra of the glass-ceramics list in Table 3-5 (a-c) .

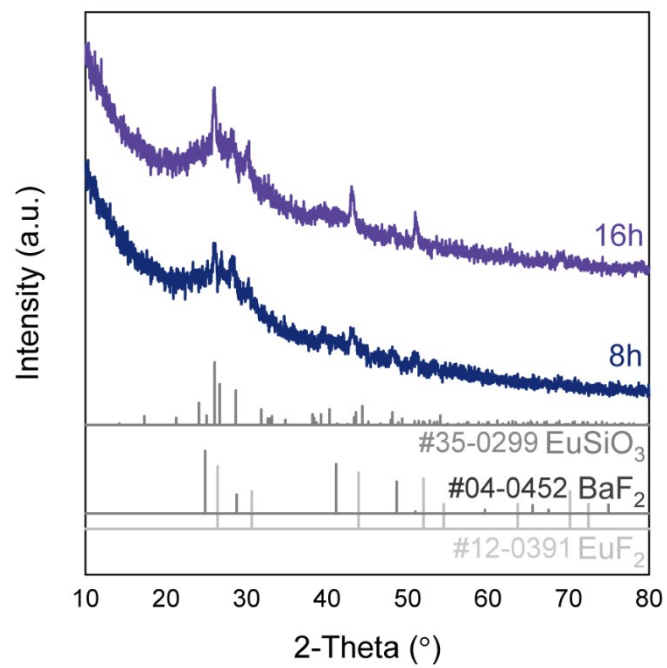

Figure S5 XRD curves of glass-ceramic samples obtained by heat treating glass sample E2 at 580 °C for 8 or 16 hours.

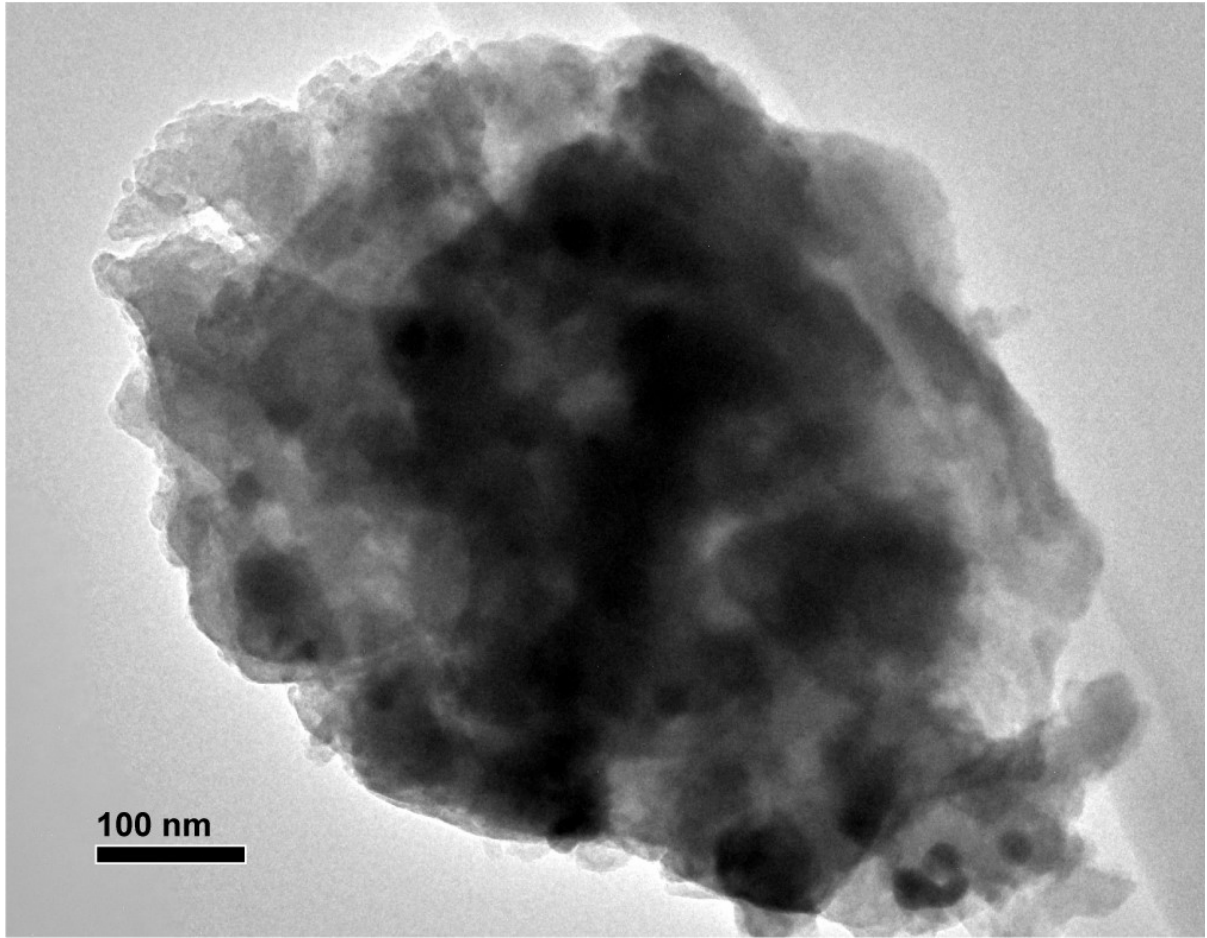

Figure S6 TEM image of glass-ceramic samples with irregular shape crystallites

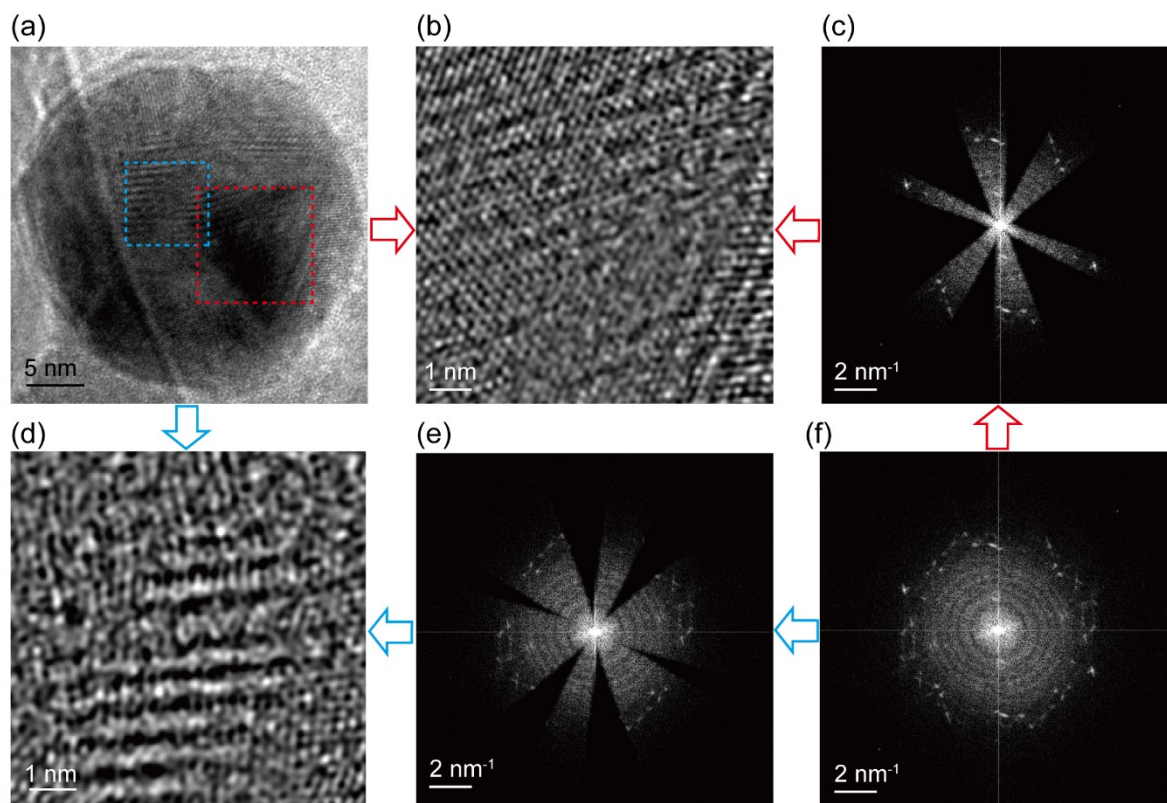

Figure S7 images of the glass-ceramic samples obtained by heat treating glass sample Eu2 at 580 °C for 4 hours (a) the inverse FFT image of two region of BaF<sub>2</sub> and EuSiO<sub>3</sub> (b, d) respectively, the FFT pattern for BaF<sub>2</sub> and EuSiO<sub>3</sub> (c, e) respectively, and FFT image of whole crystal (f).

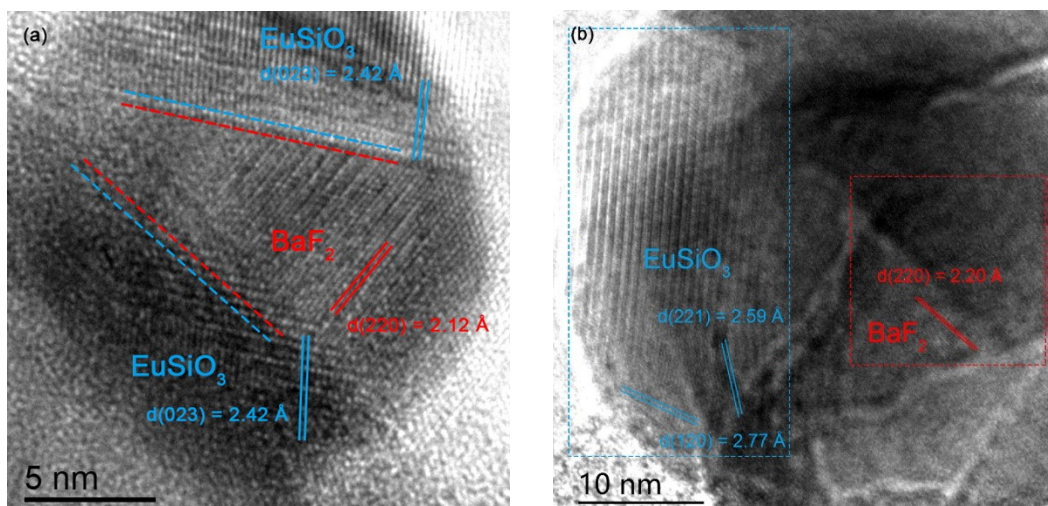

Figure S8 Two or even more HRTEM evidences can be got to confirm the EuSiO<sub>3</sub> constrained BaF<sub>2</sub> nanocrystals structures.

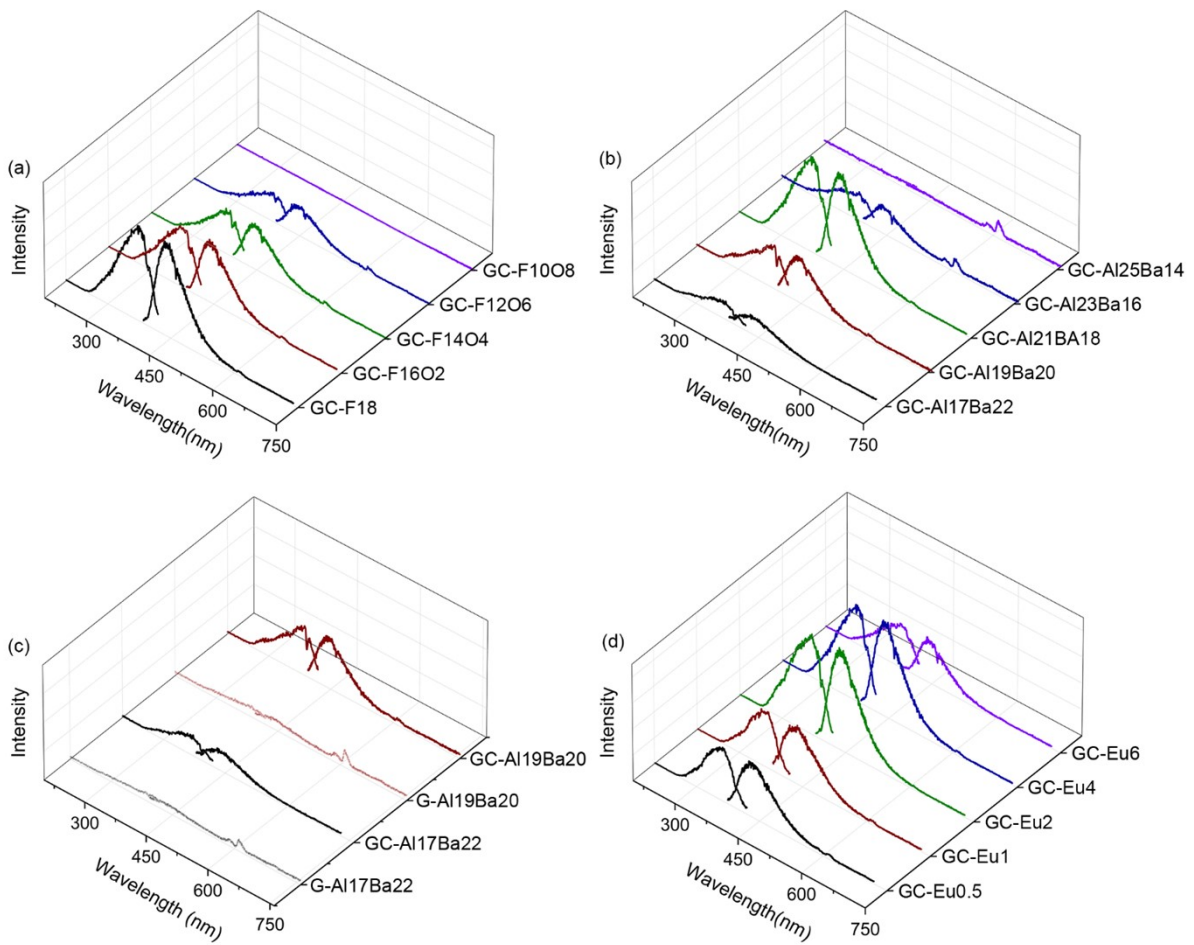

Figure S9 PL excitation and emission spectra of the glass samples list in Table 1 ~3 (a; b; d) and spectra comparison (c) between the glasses and the glass ceramics for the compositions Al17Ba22 and Al19Ba20, respectively.



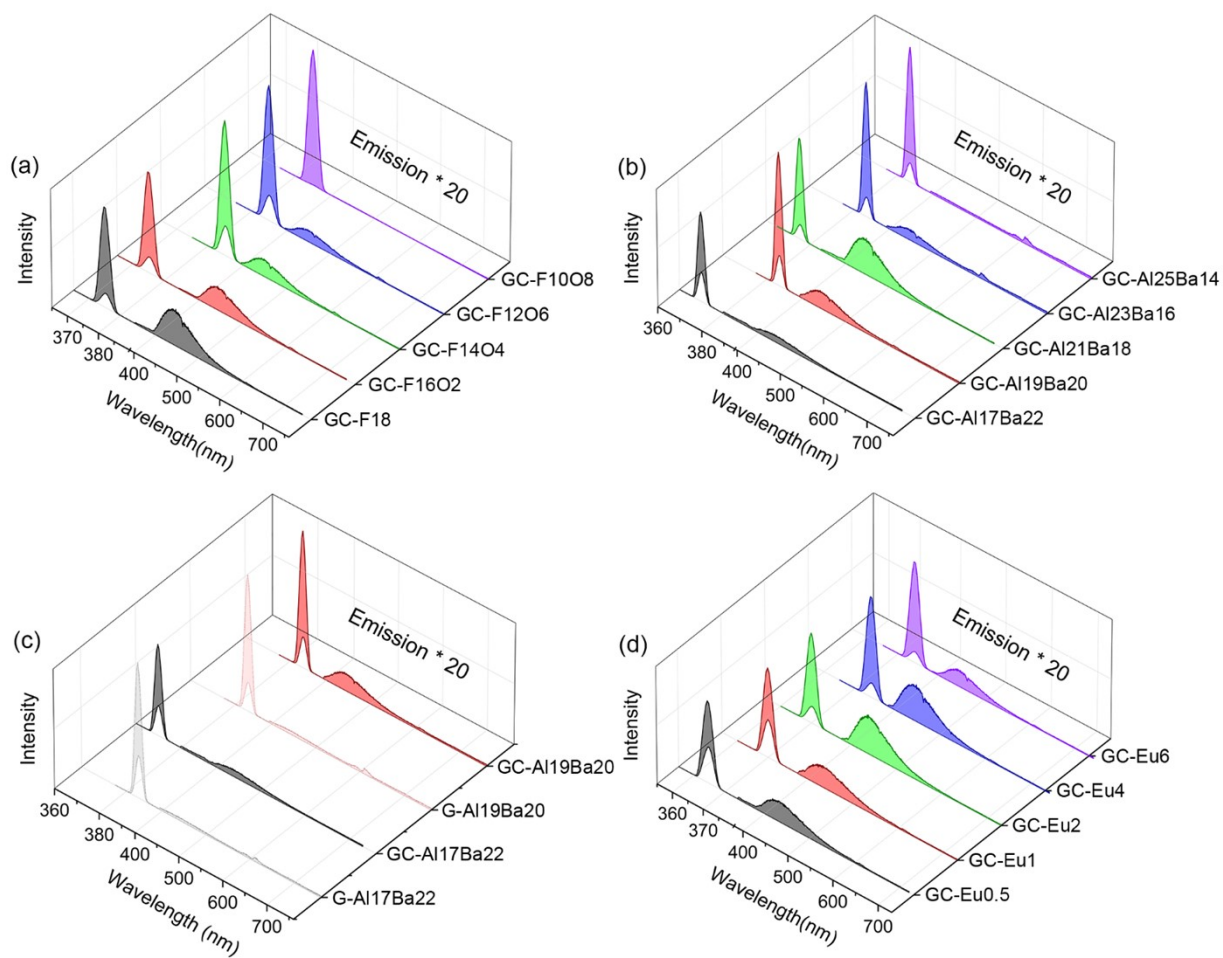

Figure S10 PL emission spectra collected by an integral sphere for the glass samples list in Table 1 ~3 (a; b; d) and spectra comparison (c) between the glasses and the glass ceramics for the compositions Al17Ba22 and Al19Ba20, respectively.

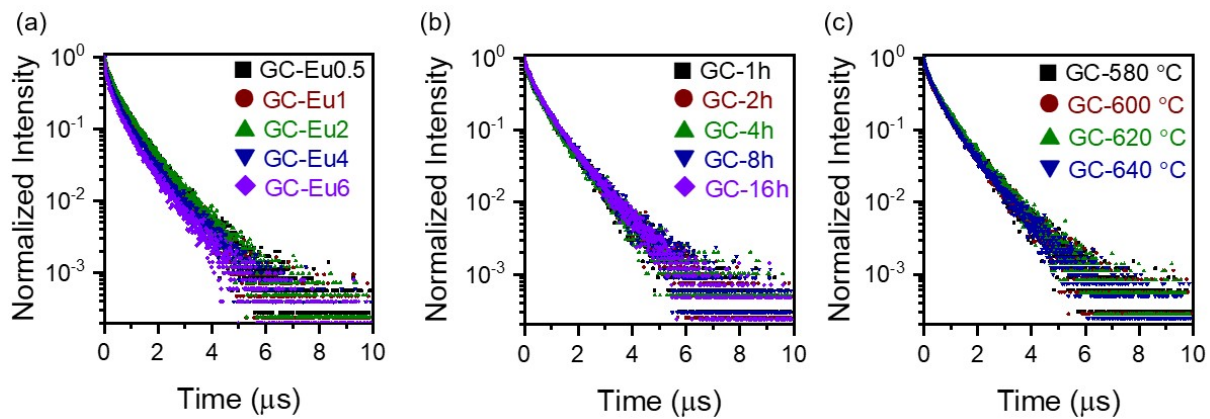

Figure S11 PL decay curves of the glass-ceramics list in Table 3-5 (a-c) .

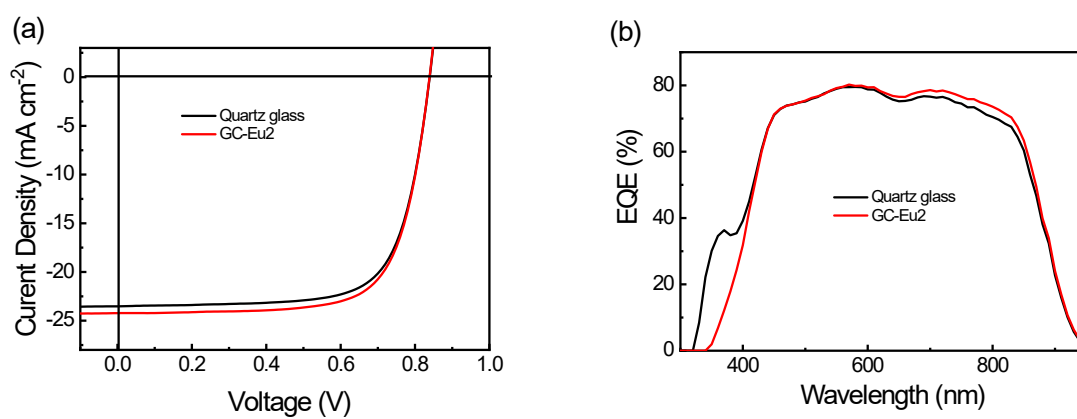

Figure S12 *J-V* curves (a) and EQE (b) of another OSCs with the spectral converting GCs and quartz glass.
